# Supplementary material
Source: PubMed Central journal article supplement (PMC4152732)
Supplement: cr2014102x4.pdf [file cr2014102x4.pdf]

## Supplementary information, Figure S4

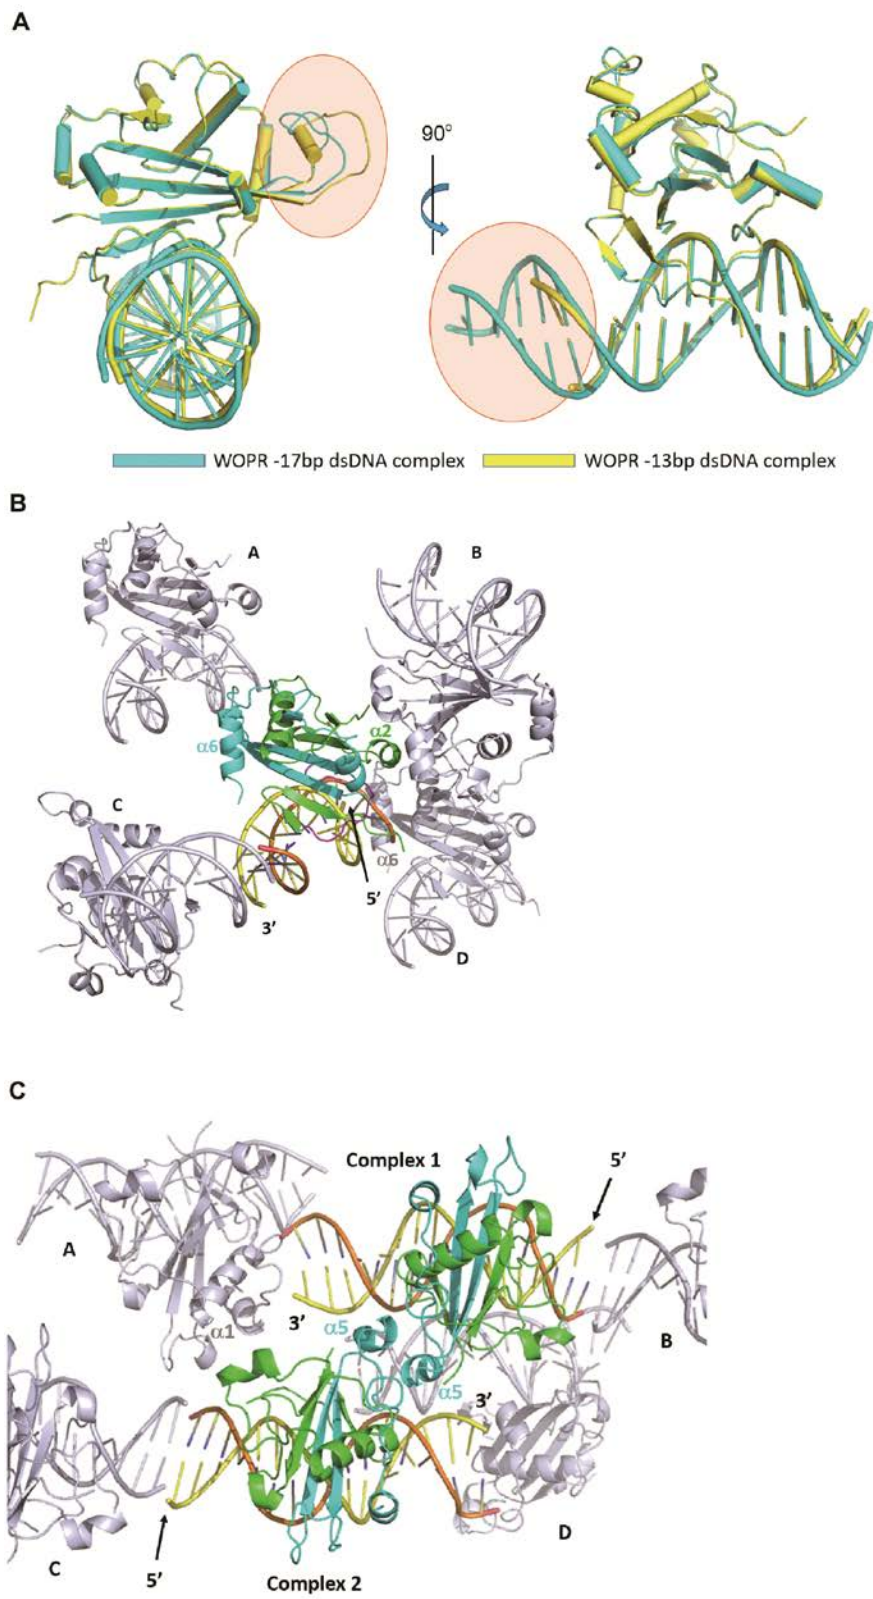

**Figure S4 Comparison of the WOPR-13bp dsDNA complex and the WOPR-17bp**

**dsDNA complex.** (A) Superposition of the WOPR-13bp dsDNA complex (in yellow) and the WOPR-17bp dsDNA complex (in cyan). The region with differed conformations is highlighted by an oval. (B) Crystal packing in the WOPR-13bp dsDNA complex. (C) Crystal packing in the WOPR-17bp dsDNA complex. The two complexes have different crystal packing modes. In the WOPR-13bp dsDNA structure, the 3'-end of the dsDNA interacts with the 3'-end of the dsDNA of a symmetry-related complex C and the 5'-end of the dsDNA interacts with  $\alpha 6$  of WOPRb of another symmetry-related complex D. In addition,  $\eta 1$  and  $\alpha 2$  of WOPRa interact with the N-terminus and the  $\alpha 1$ - $\eta 1$  loop of WOPRa of a symmetry-related complex B, and the C-terminus of WOPRa interacts with  $\alpha 4$  and the  $\alpha 4$ - $\beta 6$  loop of WOPRb of another symmetry-related complex A. In the WOPR-17bp dsDNA structure, there are complex molecules in the asymmetric unit. The 5'-end of the dsDNA of complex 1 interacts with the 5'-end of the dsDNA of a symmetry-related complex B and the 3'-end of the dsDNA interacts with  $\alpha 1$  of WOPRa of another symmetry-related complex A. In addition, the two complexes in the asymmetric unit interact with each other via  $\alpha 5$  and the  $\alpha 5$ - $\alpha 6$  loop of WOPRb.
