# Supplementary material
Source: PubMed Central journal article supplement (PMC4152732)
Supplement: cr2014102x5.pdf [file cr2014102x5.pdf]

## Supplementary information, Figure S5

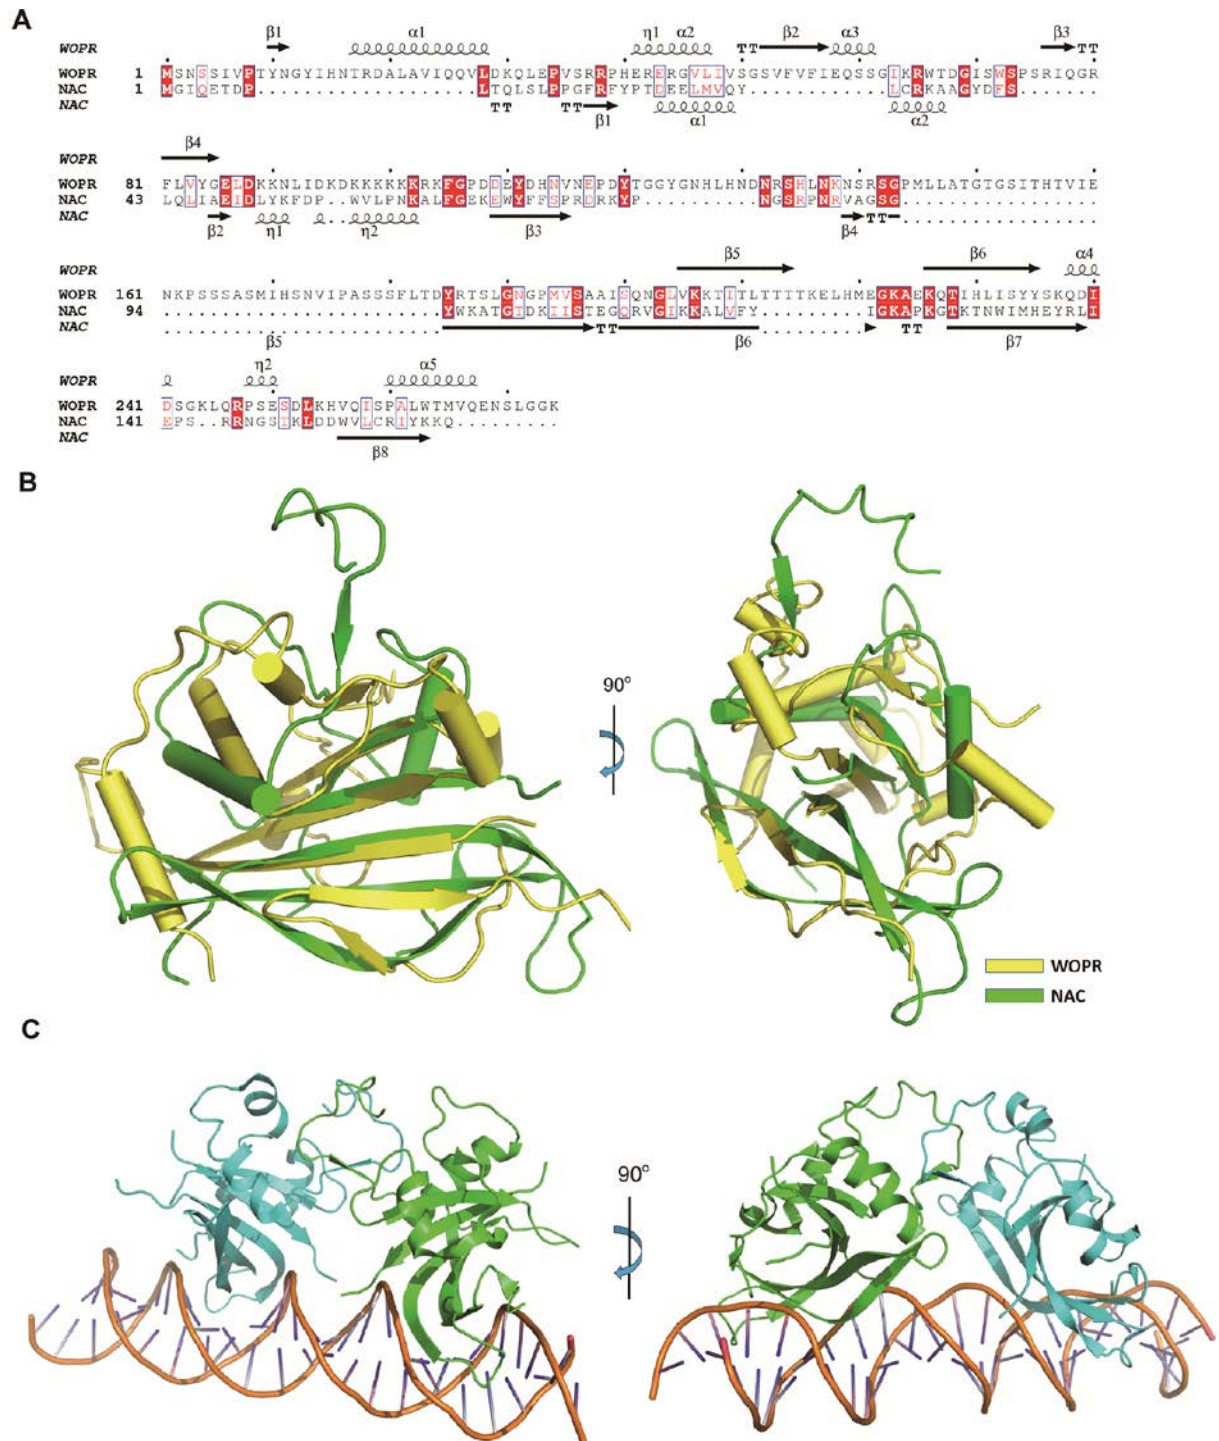

**Figure S5 Comparison of the CaWor1 WOPR domain with the NAC domain. (A)**

Sequence comparison of the WOPR domain with the NAC domain. The secondary

structures of CaWor1 WOPR are placed on the top of the alignment and these of the NAC

domain at the bottom. Strictly conserved residues are highlighted in shaded red boxes and conserved residues in open red boxes. **(B)** Structure comparison of the WOPR domain (in yellow) with the NAC domain (in green). **(C)** The NAC domain functions as a dimer to recognize the major groove of the DNA.
