# Supplementary material
Source: PubMed Central journal article supplement (PMC4152732)
Supplement: cr2014102x6.pdf [file cr2014102x6.pdf]

## Supplementary information, Figure S6

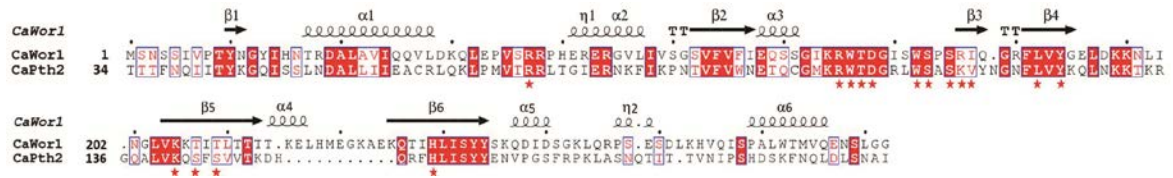

**Figure S6 Sequence comparison of the WOPR domain between CaWor1 and**

**CaPth2.** The secondary structures of CaWor1 WOPR are placed on the top of the

alignment. Strictly conserved residues are highlighted in shaded red boxes and conserved

residues in open red boxes. The residues involved in the interactions with dsDNA are

marked with asterisks.
