# Supplementary material
Source: PubMed Central journal article supplement (PMC4152732)
Supplement: cr2014102x7.pdf [file cr2014102x7.pdf]

## Supplementary information, Table S1

**Table S1 Interactions between the WOPR domain and the dsDNA**

| WOPR domain                                                             | Distance (Å) | Mediation | Distance (Å) | dsDNA          |
|-------------------------------------------------------------------------|--------------|-----------|--------------|----------------|
| <b>Hydrophilic interactions between the residues and the bases</b>      |              |           |              |                |
| Arg65-N <sup>η</sup>                                                    |              |           | 3.4          | T7'-O2         |
| Arg65-N <sup>η</sup>                                                    |              |           | 2.7          | T6'-O2         |
| Arg65-N <sup>η</sup>                                                    |              |           | 3.3          | A5'-N3         |
| Arg65-N <sup>η</sup>                                                    | 3.1          | Wat       | 2.8          | A6-N3          |
| Arg65-N <sup>η</sup>                                                    | 3.1          | Wat       | 3.2          | A7-N3          |
| Ser75-O <sup>γ</sup>                                                    |              |           | 2.9          | C9-N4          |
| Ser75-O <sup>γ</sup>                                                    | 2.7          | Wat       | 3.1          | T10-O4         |
| Ser75-O                                                                 | 3.1          | Wat       | 3.1          | T10-O4         |
| Ser75-O                                                                 | 3.4          | Wat       | 2.7          | A8-N7          |
| Ser75-O <sup>γ</sup>                                                    | 3.2          | Wat       | 2.9          | A10'-N6        |
| Ser75-O                                                                 | 2.7          | Wat       | 2.9          | A10'-N6        |
| Arg76-N <sup>η</sup>                                                    | 2.9          | Wat       | 2.8          | A10'-N7        |
| Arg76-N <sup>η</sup>                                                    | 3.2          | Wat       | 2.9          | A10'-N6        |
| <b>Hydrophobic interactions between the residues and the bases</b>      |              |           |              |                |
| I77-C <sup>δ</sup>                                                      |              |           | 4.3          | T10-C7         |
| L82-C <sup>δ</sup>                                                      |              |           | 4.5          | T10-C7         |
| L82-C <sup>δ</sup>                                                      |              |           | 3.8          | C9-C6          |
| <b>Hydrophilic interactions between the residues and the phosphates</b> |              |           |              |                |
| Arg38-N <sup>η</sup>                                                    |              |           | 3.1          | A4'-phosphate  |
| Lys64-N                                                                 |              |           | 2.7          | A4'-phosphate  |
| Arg65-N                                                                 |              |           | 2.9          | A4'-phosphate  |
| Trp66-N                                                                 |              |           | 2.8          | A8-phosphate   |
| Thr67-O <sup>γ</sup>                                                    |              |           | 2.8          | C3'-phosphate  |
| Asp68-O <sup>δ</sup>                                                    | 2.9          | Wat       | 2.7          | A7-phosphate   |
| Asp68-N                                                                 | 3.0          | Wat       | 2.7          | A7-phosphate   |
| Arg76-N <sup>η</sup>                                                    |              |           | 2.9          | A11'-phosphate |
| Tyr84-O <sup>η</sup>                                                    | 2.5          | Wat       | 2.9          | A8-phosphate   |
| Lys206-N <sup>ζ</sup>                                                   | 2.8          | Wat       | 2.7          | A7-phosphate   |
| Lys206-N <sup>ζ</sup>                                                   |              |           | 3.1          | A8-phosphate   |
| Thr208-O <sup>γ</sup>                                                   | 2.8          | Wat       | 2.9          | A8-phosphate   |
| Thr208-O <sup>γ</sup>                                                   | 2.7          | Wat       | 2.8          | C9-phosphate   |
| Thr208-O                                                                | 3.2          | Wat       | 2.8          | C9-phosphate   |
| Thr210-O <sup>γ</sup>                                                   |              |           | 2.7          | C9-phosphate   |
| His230-N <sup>δ</sup>                                                   | 2.5          | Wat       | 2.6          | A8-phosphate   |
