# Supplementary material
Source: PubMed Central journal article supplement (PMC4152732)
Supplement: cr2014102x8.pdf [file cr2014102x8.pdf]

## Supplementary information, Table S2

Table S2 Binding affinity of WOPR mutations with dsDNA

| Mutation            | Dissociation constant (nM) |
|---------------------|----------------------------|
| Wor1(5-93)(201-273) | 132.5 $\pm$ 3.0            |
| R38A                | >1000                      |
| R65A                | >1000                      |
| S73A                | 150.6 $\pm$ 15.1           |
| S75A                | >1000                      |
| R76A                | >1000                      |
| I77A                | 128.0 $\pm$ 3.5            |
| L82A                | >1000                      |
| T208A               | 211.6 $\pm$ 7.2            |
| T210A               | 362.3 $\pm$ 10.3           |
