# Supplementary material
Source: PubMed Central journal article supplement (PMC4152732)
Supplement: cr2014102x9.pdf [file cr2014102x9.pdf]

## Supplementary information, Table S3

Table S3 dsDNA used in the EMSA

| Name                    | Template strand sequence |
|-------------------------|--------------------------|
| <i>WOR1</i> site 2      | aagaagtTAAACTttttga      |
| <i>WOR1</i> site 2 T5A  | aagaagtAAAACtTttttga     |
| <i>WOR1</i> site 2 T5G  | aagaagtGAAACtTttttga     |
| <i>WOR1</i> site 2 T5C  | aagaagtCAAACtTttttga     |
| <i>WOR1</i> site 2 A6T  | aagaagtTTAACTttttga      |
| <i>WOR1</i> site 2 A6G  | aagaagtTGAACtTttttga     |
| <i>WOR1</i> site 2 A6C  | aagaagtTCAACtTttttga     |
| <i>WOR1</i> site 2 A7T  | aagaagtTATACTttttga      |
| <i>WOR1</i> site 2 A7G  | aagaagtTAGACTttttga      |
| <i>WOR1</i> site 2 A7C  | aagaagtTACACTttttga      |
| <i>WOR1</i> site 2 A8T  | aagaagtTAATCTttttga      |
| <i>WOR1</i> site 2 A8G  | aagaagtTAAGCTttttga      |
| <i>WOR1</i> site 2 A8C  | aagaagtTAACCTttttga      |
| <i>WOR1</i> site 2 C9G  | aagaagtTAAAGtTttttga     |
| <i>WOR1</i> site 2 C9A  | aagaagtTAAAAtTttttga     |
| <i>WOR1</i> site 2 C9T  | aagaagtTAAATtTttttga     |
| <i>WOR1</i> site 2 T10A | aagaagtTAAACAtttttga     |
| <i>WOR1</i> site 2 T10C | aagaagtTAAACCttttga      |
| <i>WOR1</i> site 2 T10G | aagaagtTAAACGttttga      |
